# Supplementary material for: Impact of Topical Interventions on the Vaginal Microbiota and Metabolome in Postmenopausal Women: A Secondary Analysis of a Randomized Clinical Trial
Source: PubMed Central journal article supplement (PMC8968546; doi:10.1001/jamanetworkopen.2022.5032), 2022-03-30
Supplement: jamanetwopen-e225032-s002.pdf [file jamanetwopen-e225032-s002.pdf]

## Supplemental Online Content

Srinivasan S, Hua X, Wu MC, et al. Impact of topical interventions on the vaginal microbiota and metabolome in postmenopausal women: a secondary analysis of a randomized clinical trial. *JAMA Netw Open*. 2022;5(3):e225032.  
doi:10.1001/jamanetworkopen.2022.5032

### **eMethods.**

**eFigure 1.** Relative Abundance and  $\alpha$  Diversity in the Placebo, Moisturizer and Estradiol Groups at Baseline, Week 4 and Week 12

**eFigure 2.** Unsupervised Hierarchical Clustering of Bacterial Communities at Baseline

**eFigure 3.** Unsupervised Hierarchical Clustering of Metabolic Profiles at Baseline

**eFigure 4.** Vaginal Microbiota and Metabolites are Highly Correlated

**eFigure 5.** Small but Significant Increase in Serum Estradiol Concentrations of Women Using Vaginal Estradiol

**eTable 1.** Comparison of Change in Individual Bacterial Taxa in the Estradiol Group vs the Placebo Group

**eTable 2.** Comparison of Change in Individual Bacterial Taxa in the Moisturizer vs the Placebo Group

**eTable 3.** Comparison of Change in Individual Metabolites in the Estradiol Group vs the Placebo Group

**eTable 4.** Comparison of Change in Individual Metabolites in the Moisturizer Group vs the Placebo Group

**eTable 5.** Demographic and Clinical Characteristics of Participants by Microbial Diversity Grouping at Baseline

This supplemental material has been provided by the authors to give readers additional information about their work.

## **eMethods.**

**Molecular Methods:** DNA from vaginal swabs was extracted using the BiOstic Bacteremia kit (Qiagen, Germantown, MD). Blank swabs (negative controls) were extracted to monitor potential laboratory contamination. PCR inhibition was evaluated using an internal amplification control assay.<sup>1</sup> Bacterial DNA concentrations were measured using a TaqMan-based qPCR assay.<sup>2</sup> The vaginal microbiota was characterized by sequencing on the Illumina MiSeq instrument (Illumina, San Diego, CA).<sup>3,4</sup> The *DADA2* package was used for processing reads resulting in a list of unique sequence variants (SVs); taxonomy was assigned to the SVs by placing on a custom phylogenetic tree.<sup>2,3,4</sup> Sequences have been deposited in the NCBI SRA (PRJNA788936).

**Metabolomic Profiling:** Broad-based metabolomics was performed on a liquid-chromatography-mass spectrometry (LC-MS/MS) platform at Northwest Metabolomics Research Center.<sup>5</sup> Aqueous metabolites were extracted from vaginal fluid samples using methanol, the supernatant was dried and reconstituted in solvents containing isotope-labeled internal standards to monitor LC-MS assay performance. Pooled study samples and commercially available pooled serum (Innovative Research, Novi, MI) were extracted in the same manner as samples and used as quality controls (QCs) to monitor instrument performance and batch-to-batch normalization. Samples were analyzed with targeted LC-MS/MS based on an AB SCIEX 6500 triple quad mass spectrometer (Framingham, MA) using negative- and positive-ionization modes. Pooled study QC samples were run before and after every 10 samples to monitor instrument performance.

**Estradiol concentrations in serum samples:** Serum estradiol levels were measured at the Brigham Research Assay Core Laboratory (Boston, MA) using LC-MS/MS on the AB-SCIEX Triple Quad 5500+ system post-derivatization with dansyl chloride and addition of deuterated

estradiol to each sample as an internal standard.<sup>6,7</sup> The linear range of the assay was 1-500 pg/mL; lower limit of quantitation, 1 pg/mL. Inter-assay CVs were 6.9%, 7.0%, 4.8% at concentrations of 8, 77, 206 pg/mL, respectively. Cross-reactivity of estrone, testosterone, DHEA, DHEAS, DHT, androstenedione was negligible at ten times the circulating concentrations of these hormones. This assay is certified by CDC's Hormone Standardization Program; mean bias for QC samples provided by CDC Hormone Standardization Program was 0.81 pg/mL for estradiol concentrations  $\leq 20$  pg/mL, and 1.9% estradiol concentrations  $> 20$  pg/mL.

## References

1. Khot PD, Ko DL, Hackman RC, Fredricks DN. Development and optimization of quantitative PCR for the diagnosis of invasive aspergillosis with bronchoalveolar lavage fluid. *BMC infectious diseases*. 2008;8:73.
2. Srinivasan S, Hoffman NG, Morgan MT, et al. Bacterial communities in women with bacterial vaginosis: high resolution phylogenetic analyses reveal relationships of microbiota to clinical criteria. *PLoS One*. 2012;7(6):e37818.
3. Golob JL, Pergam SA, Srinivasan S, et al. Stool Microbiota at Neutrophil Recovery Is Predictive for Severe Acute Graft vs Host Disease After Hematopoietic Cell Transplantation. *Clinical infectious diseases : an official publication of the Infectious Diseases Society of America*. 2017;65(12):1984-1991.
4. Srinivasan S, Chambers LC, Tapia KA, et al. Urethral Microbiota in Men: Association of Haemophilus influenzae and Mycoplasma penetrans With Nongonococcal Urethritis. *Clin Infect Dis*. 2021;73(7):e1684-e1693.
5. Srinivasan S, Morgan MT, Fiedler TL, et al. Metabolic signatures of bacterial vaginosis. *mBio*. 2015;6(2).
6. Snyder PJ, Bhasin S, Cunningham GR, et al. Effects of Testosterone Treatment in Older Men. *N Engl J Med*. 2016;374(7):611-624.
7. Jasuja GK, Travison TG, Davda M, et al. Age trends in estradiol and estrone levels measured using liquid chromatography tandem mass spectrometry in community-dwelling men of the Framingham Heart Study. *J Gerontol A Biol Sci Med Sci*. 2013;68(6):733-740.

## FIGURE LEGENDS

**eFigure 1:** Relative abundance of bacterial taxa shown at the species or genus level for visualization. Bacterial taxa less than 1% abundance were categorized in the “other” group. Alpha diversity (Shannon Diversity Index) shown below the relative abundances for each participant at each timepoint.

**eFigure 2:** Unsupervised hierarchical clustering of vaginal bacterial communities at baseline separated women into two groups. One group had a lower SDI compared to women in the other group (0.60 vs 2.51,  $P < 0.001$ ), hence labeled as Low Diversity and High Diversity Groups.

**eFigure 3:** Unsupervised hierarchical clustering of metabolic profiles at baseline separated women largely into their baseline diversity groups suggesting a correlation between the vaginal microbiota and small molecule metabolites.

**eFigure 4:** The vaginal microbiota and small molecule metabolites are correlated as depicted in the principal coordinates plot showing the top principal coordinate for each data element (**A**). Dots are colored by diversity group at baseline (See eFigure 3). A Locally Weighted Scatterplot Smoothing (LOWESS) line (red, dashed) was added to help visualize the correlation between the microbiota and metabolite profiles. The pH of samples at baseline was also highly correlated with alpha diversity (Shannon Diversity Index) (**B**). A consistent positive correlation between the microbiota and metabolites were noted over time, with the strongest correlation noted among estradiol users (**C**). LOWESS lines, colored by intervention arm, was added to each panel to help visualize the correlation between the microbiota and metabolites. Maximal changes in the composition of the microbiota and metabolites occurred at the 4-week timepoint and changes between week 4 and week 12 were relatively small (**C**).

**eFigure 5:** Use of 10- $\mu$ g estradiol tablet (plus placebo gel) nightly for 2-weeks and then 2-times for 2-weeks resulted in a small but significant increase in serum estradiol concentrations

( $P=0.015$ ) (**5A**). Such a change was not noted among the placebo group ( $P=0.48$ ). There were no changes in serum estradiol concentrations by week 12 among women in the Low ( $P=0.14$ ) or High Diversity ( $P=0.91$ ) groups (**5B**).

# Supplement 2, eFigure 1

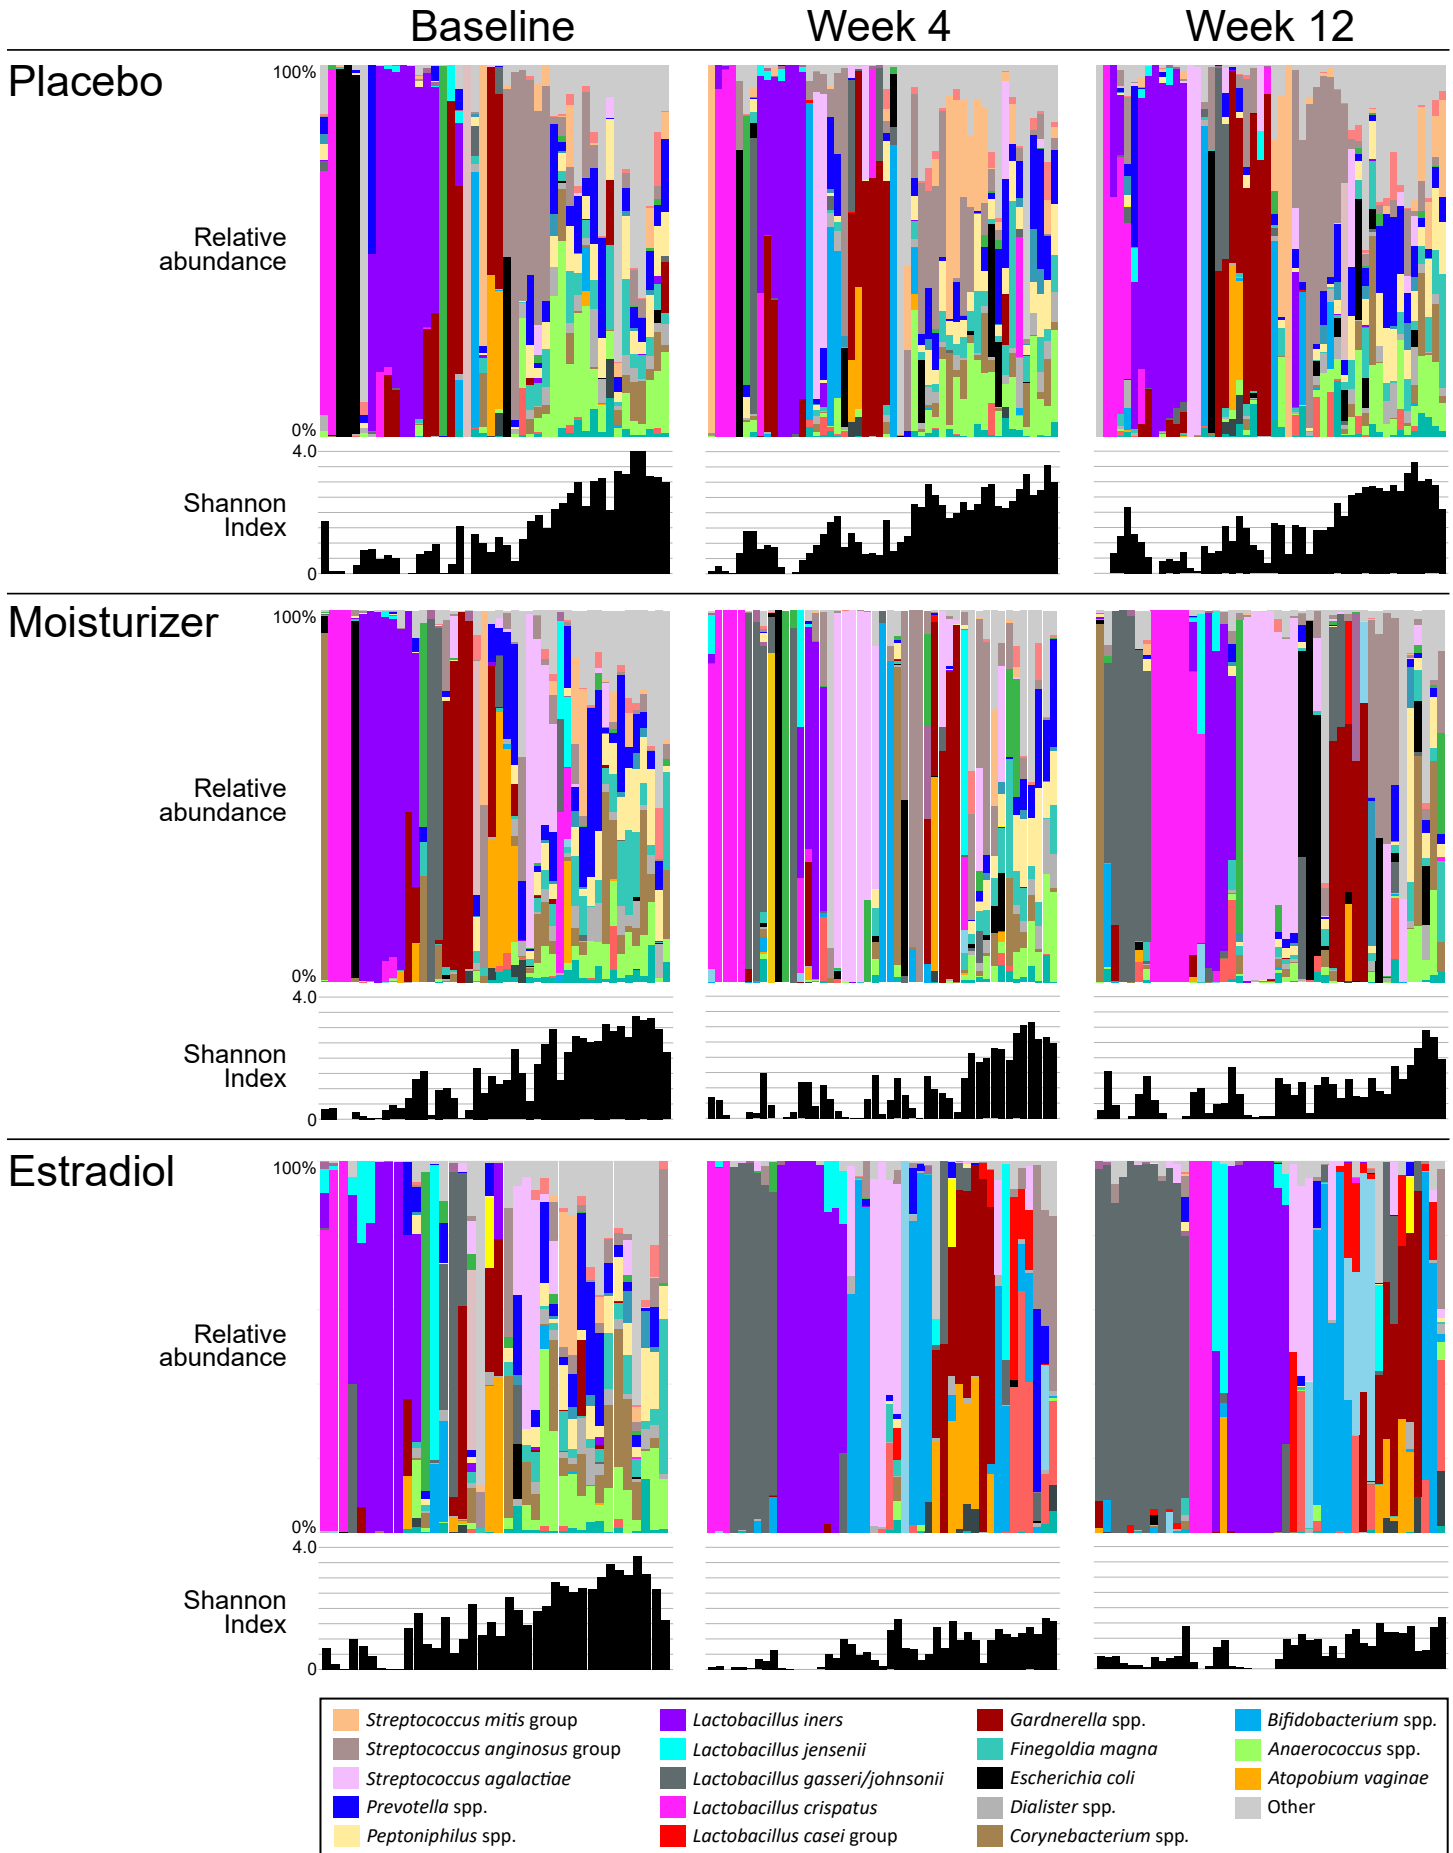

## Supplement 2, eFigure 2

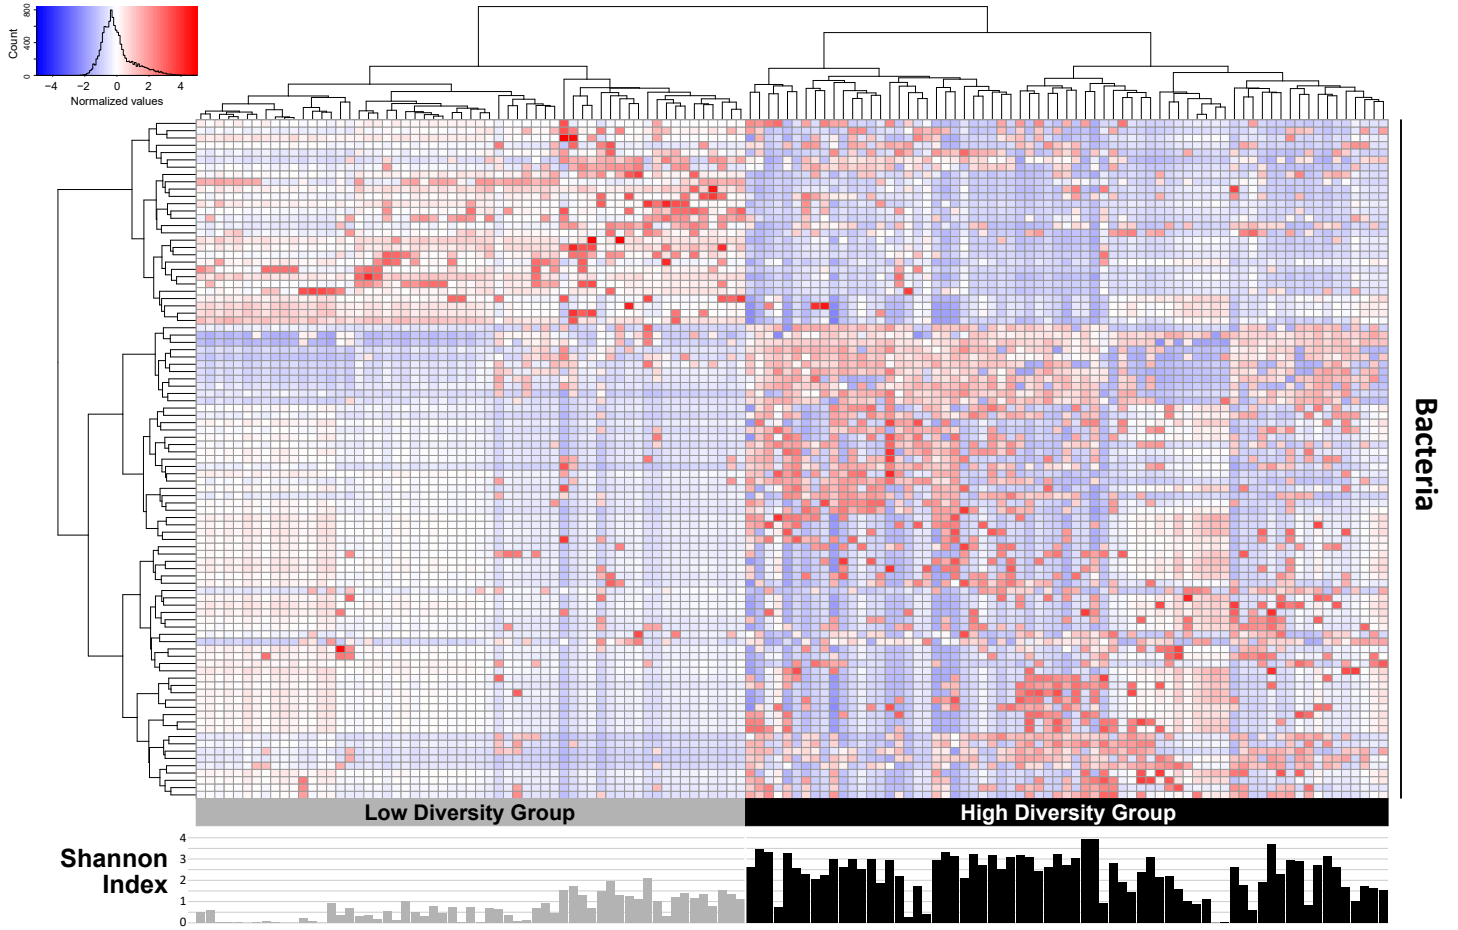

# Supplement 2, eFigure 3

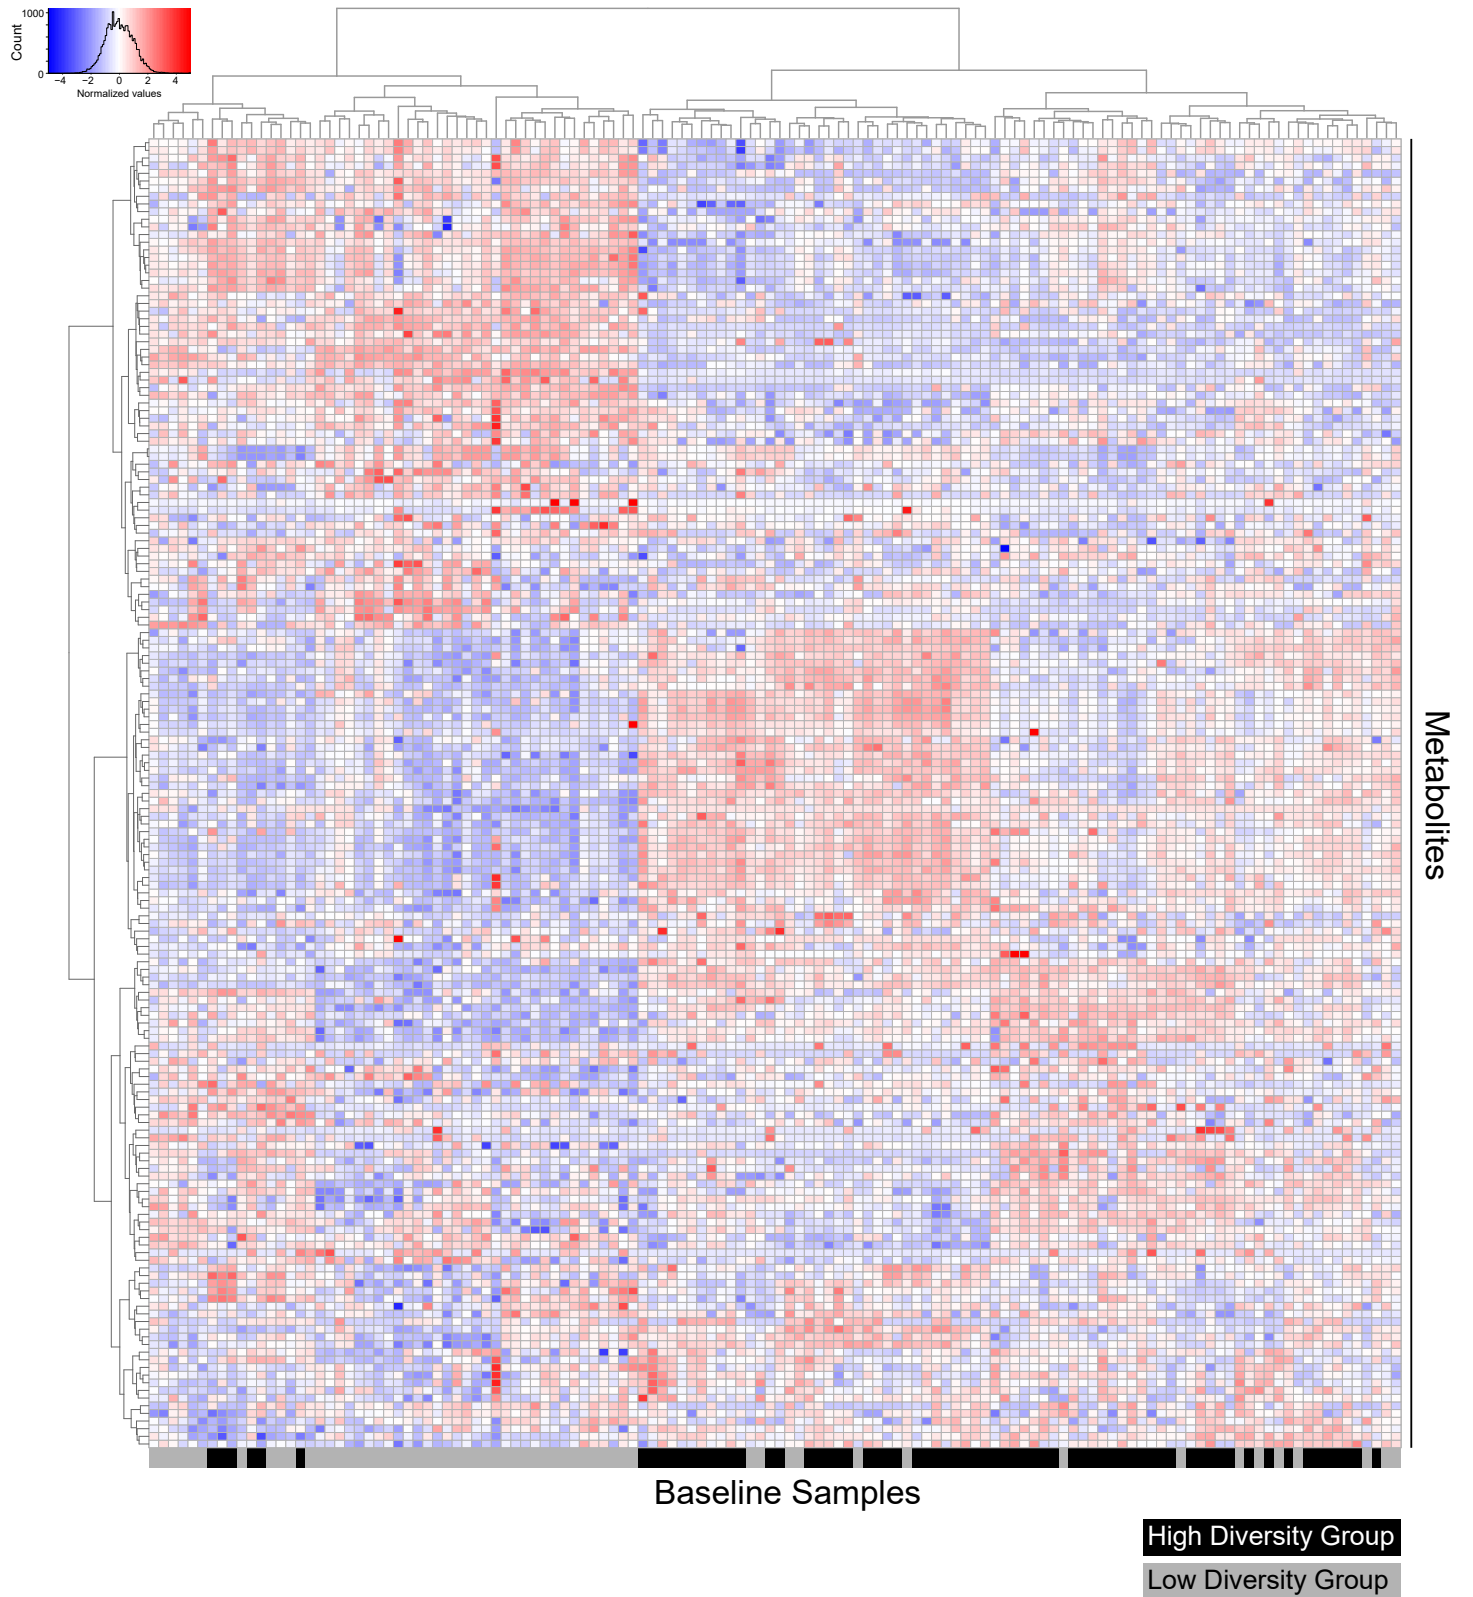



# Supplement 2, eFigure 4

**A.**

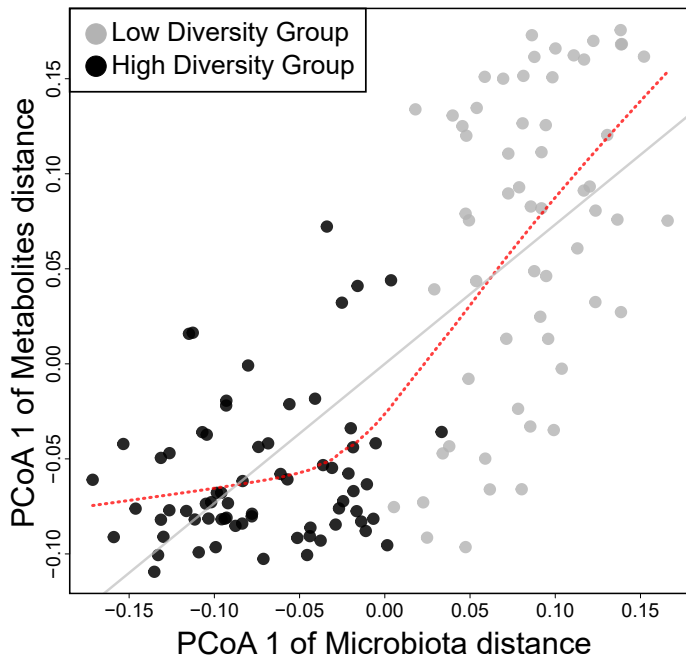

**B.**

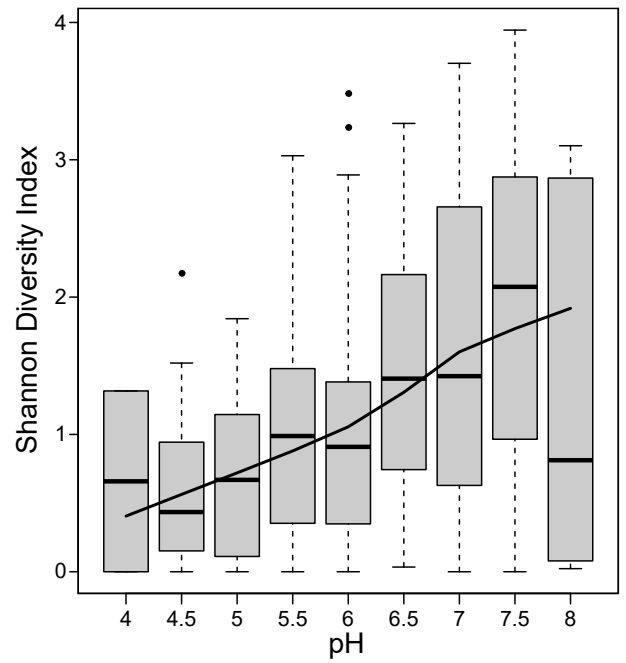

**C.**

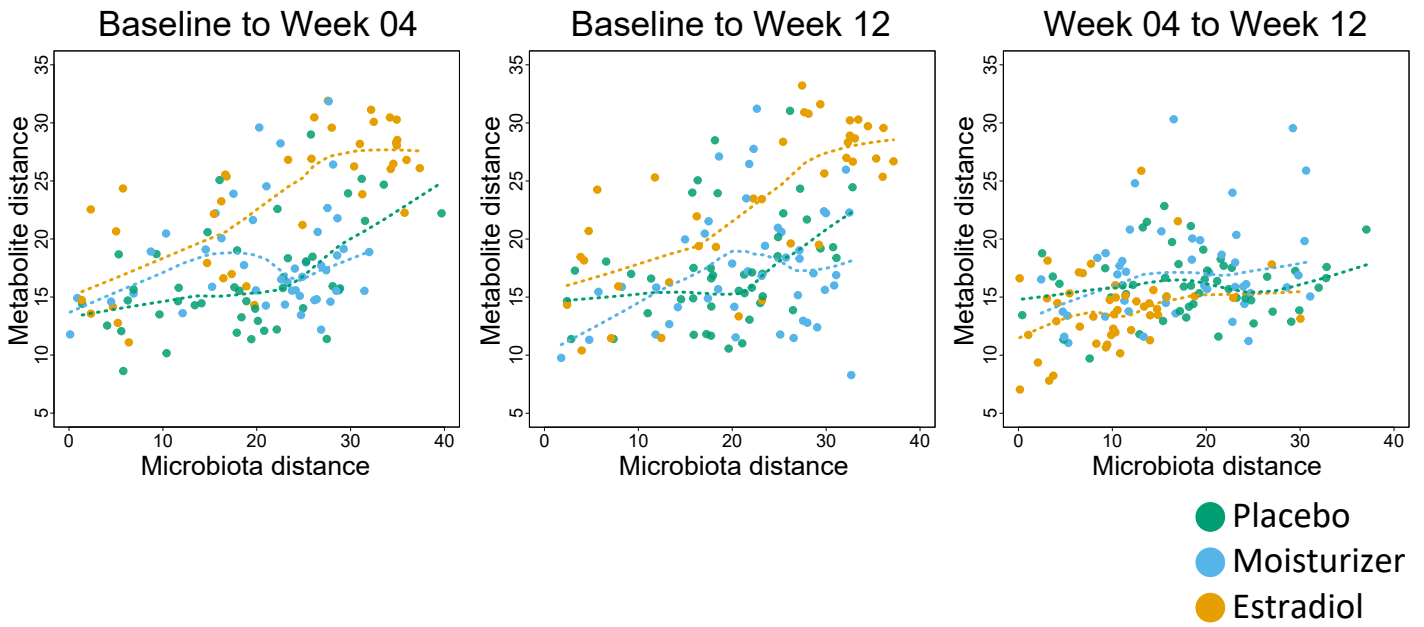

Supplement 2, eFigure 5A

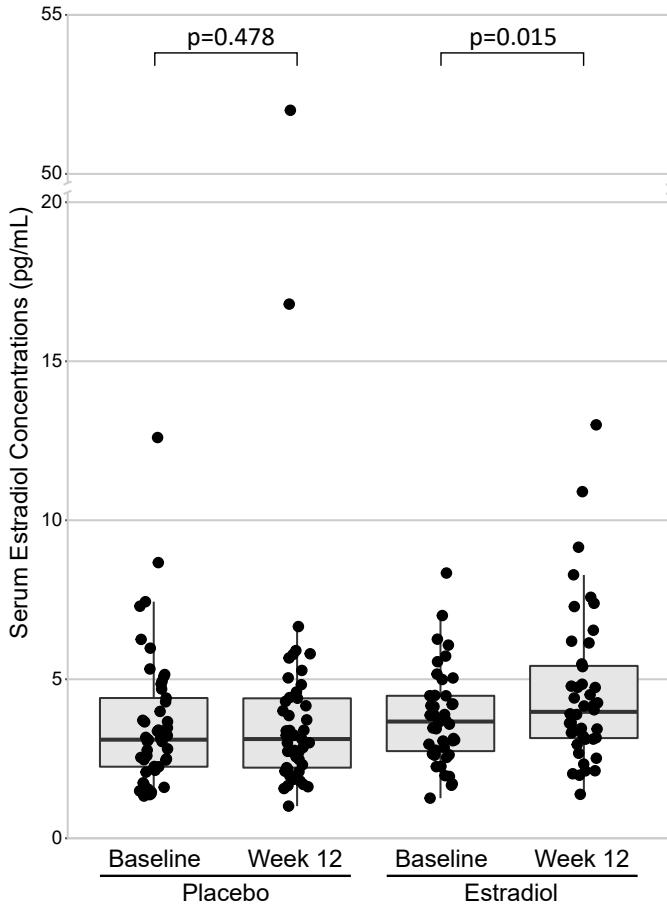

Supplement 2, eFigure 5B

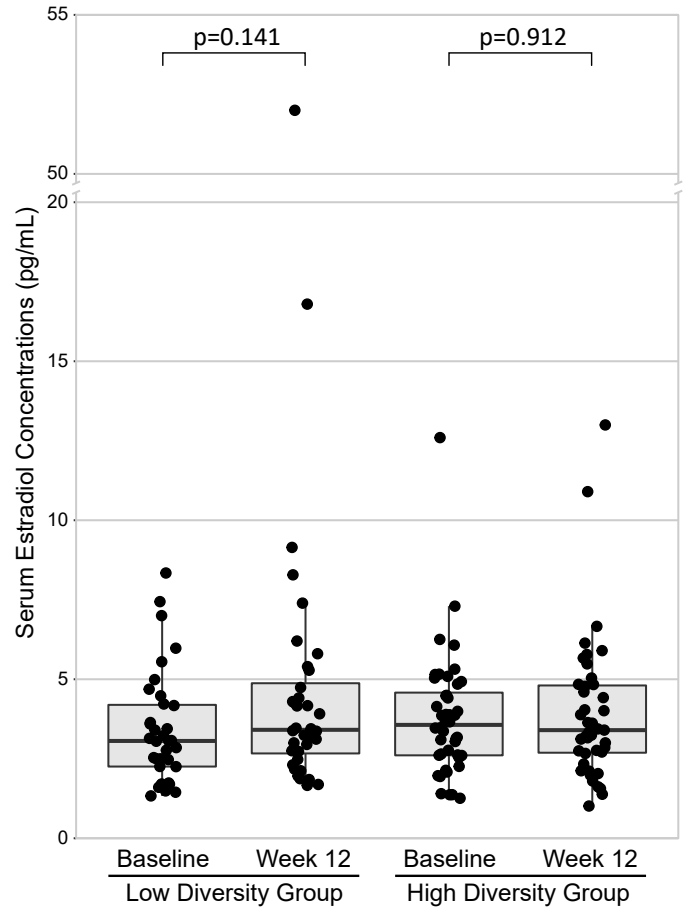

**Supplement 2, eTable 1: Comparison of change in individual bacterial taxa in the estradiol group versus the placebo group**

| Taxon                                                      | Estradiol (Est) | Estradiol (SE) | Estradiol (p-value) | Estradiol (q-value) |
|------------------------------------------------------------|-----------------|----------------|---------------------|---------------------|
| <i>Lactobacillus casei</i> group                           | 1.688           | 0.286          | <0.001              | <0.001              |
| <i>Lactobacillus acidophilus/kitasatonis</i>               | 1.269           | 0.292          | <0.001              | 0.001               |
| <i>Streptococcus mitis</i> group                           | -1.961          | 0.475          | <0.001              | 0.002               |
| <i>Bifidobacterium bifidum</i>                             | 1.253           | 0.307          | <0.001              | 0.002               |
| <i>Lactobacillus gasseri/johnsonii</i>                     | 2.271           | 0.567          | <0.001              | 0.002               |
| <i>Peptoniphilus grossensis/harei/phoceensis</i>           | -1.591          | 0.402          | <0.001              | 0.002               |
| <i>Anaerococcus vaginalis</i>                              | -1.616          | 0.416          | <0.001              | 0.002               |
| <i>Peptoniphilus coxii</i>                                 | -1.065          | 0.290          | <0.001              | 0.004               |
| <i>Finegoldia magna</i>                                    | -1.488          | 0.405          | <0.001              | 0.004               |
| <i>Bifidobacterium dentium</i>                             | 1.314           | 0.373          | <0.001              | 0.005               |
| <i>Prevotella colorans</i>                                 | 0.704           | 0.226          | 0.002               | 0.019               |
| <i>Prevotella timonensis</i>                               | -1.261          | 0.448          | 0.006               | 0.044               |
| <i>Bifidobacterium breve</i>                               | 0.882           | 0.330          | 0.008               | 0.055               |
| <i>Corynebacterium pyruviciproducens</i>                   | -0.740          | 0.281          | 0.009               | 0.055               |
| <i>Campylobacter ureolyticus</i>                           | -0.741          | 0.286          | 0.010               | 0.055               |
| <i>Dialister propionificaciens</i>                         | -0.933          | 0.362          | 0.011               | 0.055               |
| <i>Streptococcus agalactiae</i>                            | 1.477           | 0.573          | 0.011               | 0.055               |
| <i>Anaerococcus mediterraneensis</i>                       | -0.986          | 0.383          | 0.011               | 0.055               |
| <i>Corynebacterium genitalium</i>                          | 0.598           | 0.233          | 0.011               | 0.055               |
| <i>Varibaculum anthropi/cambriense</i>                     | -0.968          | 0.384          | 0.013               | 0.060               |
| <i>Atopobium vaginae</i>                                   | 1.225           | 0.500          | 0.015               | 0.068               |
| <i>Aerococcus christensenii</i>                            | 0.806           | 0.333          | 0.017               | 0.071               |
| <i>Lawsonella</i>                                          | -0.740          | 0.310          | 0.018               | 0.074               |
| <i>Lactobacillus jensenii</i>                              | 1.201           | 0.519          | 0.022               | 0.086               |
| <i>Streptococcus anginosus</i> group                       | -1.401          | 0.620          | 0.025               | 0.094               |
| <i>Corynebacterium riegelii</i>                            | 0.556           | 0.248          | 0.027               | 0.096               |
| <i>Alloscardovia omnicolens</i>                            | 0.906           | 0.409          | 0.028               | 0.098               |
| <i>Howardella</i>                                          | 0.836           | 0.385          | 0.032               | 0.105               |
| <i>Prevotella bivia</i>                                    | 0.745           | 0.349          | 0.035               | 0.111               |
| <i>Bifidobacterium longum</i>                              | 0.550           | 0.276          | 0.048               | 0.147               |
| <i>Facklamia hominis</i>                                   | -0.603          | 0.304          | 0.049               | 0.147               |
| <i>Ezakiella</i>                                           | -0.662          | 0.341          | 0.054               | 0.156               |
| <i>Dialister micraerophilus</i>                            | 0.702           | 0.365          | 0.057               | 0.160               |
| <i>Facklamia ignava</i>                                    | 0.459           | 0.242          | 0.059               | 0.163               |
| <i>Peptoniphilus</i>                                       | -0.634          | 0.337          | 0.062               | 0.165               |
| <i>Porphyromonas bennonis</i>                              | -0.427          | 0.239          | 0.075               | 0.191               |
| <i>Mobiluncus curtisii</i>                                 | -0.483          | 0.270          | 0.076               | 0.191               |
| <i>Prevotella buccalis</i>                                 | -0.422          | 0.242          | 0.083               | 0.204               |
| <i>Actinomyces europaeus</i>                               | 0.411           | 0.244          | 0.094               | 0.224               |
| <i>Prevotella bergensis</i>                                | -0.414          | 0.250          | 0.100               | 0.231               |
| <i>Gemella haemolysans/sanguinis</i>                       | -0.461          | 0.287          | 0.111               | 0.251               |
| <i>Corynebacterium coyleae</i>                             | 0.405           | 0.262          | 0.125               | 0.277               |
| <i>Peptoniphilus lacrimalis</i>                            | -0.372          | 0.248          | 0.136               | 0.295               |
| <i>Lactobacillus reuteri/vaginalis</i>                     | 0.561           | 0.384          | 0.146               | 0.308               |
| <i>Prevotella disiens</i>                                  | -0.578          | 0.400          | 0.150               | 0.311               |
| <i>Casaltella massiliensis</i>                             | -0.341          | 0.251          | 0.177               | 0.353               |
| <i>Prevotella corporis</i>                                 | 0.422           | 0.314          | 0.181               | 0.353               |
| <i>Corynebacterium pseudogenitalium/tuberculostearicum</i> | -0.442          | 0.329          | 0.182               | 0.353               |
| <i>Fusobacterium nucleatum</i>                             | -0.326          | 0.263          | 0.216               | 0.409               |
| <i>Porphyromonas uenonis</i>                               | -0.355          | 0.289          | 0.220               | 0.409               |
| <i>Lactobacillus iners</i>                                 | 0.887           | 0.744          | 0.235               | 0.424               |
| <i>Peptoniphilus koenoenieniae</i>                         | 0.285           | 0.242          | 0.241               | 0.424               |
| <i>Actinomyces turicensis</i>                              | -0.384          | 0.327          | 0.242               | 0.424               |
| <i>Peptostreptococcus anaerobius</i>                       | -0.328          | 0.284          | 0.249               | 0.429               |
| <i>Faecalibacterium prausnitzii</i>                        | -0.301          | 0.267          | 0.260               | 0.440               |
| <i>Helcococcus</i>                                         | 0.277           | 0.256          | 0.279               | 0.464               |
| <i>Fenollaria massiliensis/timonensis</i>                  | -0.306          | 0.287          | 0.288               | 0.469               |
| <i>Dialister</i> sp. type 2                                | 0.400           | 0.392          | 0.309               | 0.496               |
| <i>Enterococcus faecalis</i>                               | 0.328           | 0.333          | 0.327               | 0.515               |
| <i>Corynebacterium mycetoides</i>                          | 0.260           | 0.275          | 0.346               | 0.537               |
| <i>Atopobium deltae</i>                                    | -0.235          | 0.255          | 0.360               | 0.548               |
| <i>Corynebacterium sundsvallense</i>                       | 0.260           | 0.289          | 0.371               | 0.556               |
| <i>Anaerococcus prevotii/tetradius</i>                     | -0.266          | 0.304          | 0.382               | 0.562               |
| <i>Anaerococcus senegalensis</i>                           | -0.229          | 0.265          | 0.389               | 0.562               |
| <i>Anaerococcus</i>                                        | -0.265          | 0.309          | 0.393               | 0.562               |
| <i>Escherichia coli</i>                                    | -0.297          | 0.355          | 0.405               | 0.571               |
| <i>Gardnerella vaginalis</i>                               | 0.526           | 0.679          | 0.440               | 0.602               |
| <i>Porphyromonas asaccharolytica</i>                       | -0.187          | 0.242          | 0.440               | 0.602               |
| <i>Fastidiosipila sanguinis</i>                            | 0.164           | 0.228          | 0.474               | 0.638               |
| <i>Parvimonas</i>                                          | 0.183           | 0.262          | 0.486               | 0.646               |
| <i>Lactobacillus crispatus</i>                             | 0.437           | 0.639          | 0.495               | 0.649               |
| <i>Candidatus Peptoniphilus massiliensis</i>               | 0.135           | 0.230          | 0.558               | 0.720               |
| <i>Anaerococcus hydrogenalis/rubeifantis</i>               | -0.158          | 0.309          | 0.610               | 0.777               |

| Taxon                                                    | Estradiol (Est) | Estradiol (SE) | Estradiol (p-value) | Estradiol (q-value) |
|----------------------------------------------------------|-----------------|----------------|---------------------|---------------------|
| <i>Murdochella asaccharolytica/Levyella massiliensis</i> | -0.105          | 0.238          | 0.660               | 0.829               |
| <i>Corynebacterium simulans/striatum</i>                 | 0.114           | 0.278          | 0.683               | 0.846               |
| <i>Fenollaria</i>                                        | -0.104          | 0.271          | 0.701               | 0.858               |
| <i>Actinobaculum massiliense</i>                         | -0.099          | 0.299          | 0.741               | 0.888               |
| <i>Ureaplasma parvum/urealyticum</i>                     | 0.112           | 0.344          | 0.745               | 0.888               |
| <i>Arcanobacterium</i>                                   | -0.069          | 0.238          | 0.774               | 0.911               |
| <i>Staphylococcus haemolyticus</i>                       | 0.070           | 0.265          | 0.791               | 0.919               |
| <i>Porphyromonas somerae</i>                             | 0.056           | 0.253          | 0.824               | 0.946               |
| <i>Actinomyces neuii</i>                                 | -0.084          | 0.424          | 0.843               | 0.956               |
| <i>Lagierella</i>                                        | 0.039           | 0.247          | 0.876               | 0.966               |
| <i>Varibaculum</i>                                       | 0.032           | 0.216          | 0.882               | 0.966               |
| <i>Corynebacterium</i>                                   | 0.045           | 0.335          | 0.894               | 0.966               |
| <i>Staphylococcus capitis/caprae/epidermidis</i>         | -0.041          | 0.308          | 0.894               | 0.966               |
| <i>Corynebacterium amycolatum</i>                        | -0.031          | 0.329          | 0.925               | 0.989               |
| <i>Anaerococcus lactolyticus</i>                         | -0.018          | 0.272          | 0.948               | 0.993               |
| <i>Actinotignum schaalii</i>                             | -0.018          | 0.289          | 0.950               | 0.993               |
| <i>Negativicoccus</i>                                    | -0.010          | 0.229          | 0.965               | 0.994               |
| <i>Corynebacterium aurimucosum/minimum/singulare</i>     | 0.007           | 0.267          | 0.978               | 0.994               |
| <i>Campylobacter hominis</i>                             | -0.005          | 0.256          | 0.983               | 0.994               |
| <i>Corynebacterium tuberculostearicum</i>                | 0.002           | 0.311          | 0.994               | 0.994               |

**Supplement 2, eTable 2: Comparison of change in individual bacterial taxa in the moisturizer group versus the placebo group**

| Taxon                                                     | Moisturizer (Est) | Moisturizer (SE) | Moisturizer (p-value) | Moisturizer (q-value) |
|-----------------------------------------------------------|-------------------|------------------|-----------------------|-----------------------|
| <i>Streptococcus mitis</i> group                          | -1.788            | 0.467            | <0.001                | 0.019                 |
| <i>Anaerococcus vaginalis</i>                             | -1.133            | 0.410            | 0.006                 | 0.149                 |
| <i>Enterococcus faecalis</i>                              | 0.949             | 0.327            | 0.004                 | 0.149                 |
| <i>Corynebacterium simulans/striatum</i>                  | 0.776             | 0.273            | 0.005                 | 0.149                 |
| <i>Corynebacterium amycolatum</i>                         | 0.866             | 0.324            | 0.008                 | 0.156                 |
| <i>Staphylococcus capitis/caprae/epidermidis</i>          | 0.790             | 0.303            | 0.010                 | 0.159                 |
| <i>Lactobacillus acidophilus/kitasatonis</i>              | 0.708             | 0.287            | 0.015                 | 0.172                 |
| <i>Prevotella timonensis</i>                              | -1.100            | 0.441            | 0.014                 | 0.172                 |
| <i>Streptococcus agalactiae</i>                           | 1.364             | 0.564            | 0.017                 | 0.174                 |
| <i>Peptoniphilus coxii</i>                                | -0.669            | 0.285            | 0.020                 | 0.186                 |
| <i>Peptoniphilus koenoeneniae</i>                         | 0.550             | 0.238            | 0.022                 | 0.186                 |
| <i>Dialister propionicifaciens</i>                        | -0.771            | 0.356            | 0.032                 | 0.249                 |
| <i>Corynebacterium riegliei</i>                           | 0.478             | 0.244            | 0.052                 | 0.375                 |
| <i>Negativicoccus</i>                                     | 0.414             | 0.225            | 0.068                 | 0.453                 |
| <i>Ezakiella</i>                                          | -0.604            | 0.335            | 0.074                 | 0.456                 |
| <i>Actinomyces europaeus</i>                              | 0.401             | 0.240            | 0.097                 | 0.561                 |
| <i>Peptoniphilus lacrimalis</i>                           | -0.390            | 0.244            | 0.113                 | 0.618                 |
| <i>Varibaculum anthropi/cambriense</i>                    | -0.591            | 0.378            | 0.120                 | 0.622                 |
| <i>Peptoniphilus grossensis/harei/phoceensis</i>          | -0.565            | 0.395            | 0.155                 | 0.635                 |
| <i>Campylobacter ureolyticus</i>                          | -0.428            | 0.281            | 0.130                 | 0.635                 |
| <i>Corynebacterium pyruviciproducens</i>                  | -0.393            | 0.276            | 0.157                 | 0.635                 |
| <i>Mobiluncus curtisii</i>                                | -0.380            | 0.266            | 0.154                 | 0.635                 |
| <i>Prevotella disiens</i>                                 | -0.581            | 0.394            | 0.142                 | 0.635                 |
| <i>Atopobium vaginae</i>                                  | 0.658             | 0.492            | 0.183                 | 0.653                 |
| <i>Peptoniphilus</i>                                      | -0.456            | 0.332            | 0.172                 | 0.653                 |
| <i>Lactobacillus crispatus</i>                            | 0.847             | 0.628            | 0.180                 | 0.653                 |
| <i>Dialister microaerophilus</i>                          | -0.468            | 0.359            | 0.195                 | 0.670                 |
| <i>Lactobacillus casei</i> group                          | 0.342             | 0.282            | 0.227                 | 0.705                 |
| <i>Casaltella massiliensis</i>                            | -0.299            | 0.247            | 0.227                 | 0.705                 |
| <i>Porphyromonas somerae</i>                              | 0.305             | 0.249            | 0.223                 | 0.705                 |
| <i>Lactobacillus gasseri/johnsonii</i>                    | 0.621             | 0.558            | 0.268                 | 0.716                 |
| <i>Anaerococcus mediterraneensis</i>                      | -0.378            | 0.377            | 0.318                 | 0.716                 |
| <i>Lactobacillus jensenii</i>                             | 0.561             | 0.510            | 0.274                 | 0.716                 |
| <i>Prevotella bivia</i>                                   | 0.366             | 0.343            | 0.288                 | 0.716                 |
| <i>Facklamia ignava</i>                                   | 0.231             | 0.237            | 0.331                 | 0.716                 |
| <i>Prevotella bergensis</i>                               | -0.242            | 0.245            | 0.326                 | 0.716                 |
| <i>Gemella haemolysans/sanguinis</i>                      | -0.317            | 0.282            | 0.264                 | 0.716                 |
| <i>Lactobacillus reuteri/vaginalis</i>                    | 0.405             | 0.377            | 0.285                 | 0.716                 |
| <i>Actinomyces turicensis</i>                             | -0.320            | 0.321            | 0.321                 | 0.716                 |
| <i>Escherichia coli</i>                                   | 0.350             | 0.349            | 0.318                 | 0.716                 |
| <i>Candidatus Peptoniphilus massiliensis</i>              | 0.247             | 0.227            | 0.278                 | 0.716                 |
| <i>Staphylococcus haemolyticus</i>                        | 0.271             | 0.261            | 0.300                 | 0.716                 |
| <i>Corynebacterium</i>                                    | 0.383             | 0.329            | 0.246                 | 0.716                 |
| <i>Porphyromonas uenonis</i>                              | -0.254            | 0.284            | 0.373                 | 0.738                 |
| <i>Faecalibacterium prausnitzii</i>                       | -0.236            | 0.262            | 0.369                 | 0.738                 |
| <i>Porphyromonas asaccharolytica</i>                      | -0.214            | 0.238            | 0.369                 | 0.738                 |
| <i>Fastidiosipila sanguinis</i>                           | 0.210             | 0.224            | 0.350                 | 0.738                 |
| <i>Lagierella</i>                                         | 0.212             | 0.242            | 0.384                 | 0.744                 |
| <i>Prevotella buccalis</i>                                | -0.187            | 0.238            | 0.433                 | 0.747                 |
| <i>Fusobacterium nucleatum</i>                            | -0.203            | 0.258            | 0.434                 | 0.747                 |
| <i>Fenollaria massiliensis/timonensis</i>                 | -0.227            | 0.282            | 0.423                 | 0.747                 |
| <i>Corynebacterium sundsvallense</i>                      | 0.229             | 0.285            | 0.422                 | 0.747                 |
| <i>Anaerococcus</i>                                       | 0.254             | 0.304            | 0.404                 | 0.747                 |
| <i>Corynebacterium aurimucosum/minutissimum/singulare</i> | 0.209             | 0.262            | 0.428                 | 0.747                 |
| <i>Bifidobacterium bifidum</i>                            | 0.203             | 0.302            | 0.503                 | 0.796                 |
| <i>Bifidobacterium breve</i>                              | 0.210             | 0.324            | 0.518                 | 0.796                 |
| <i>Alloscardovia omnicoles</i>                            | 0.266             | 0.403            | 0.509                 | 0.796                 |
| <i>Howardella</i>                                         | -0.252            | 0.379            | 0.508                 | 0.796                 |
| <i>Peptostreptococcus anaerobius</i>                      | -0.179            | 0.279            | 0.522                 | 0.796                 |
| <i>Atopobium deltae</i>                                   | -0.163            | 0.251            | 0.516                 | 0.796                 |
| <i>Anaerococcus prevotii/tetradius</i>                    | -0.194            | 0.299            | 0.518                 | 0.796                 |
| <i>Prevotella colorans</i>                                | 0.139             | 0.223            | 0.534                 | 0.798                 |
| <i>Aerococcus christensenii</i>                           | 0.197             | 0.327            | 0.549                 | 0.798                 |
| <i>Varibaculum</i>                                        | -0.128            | 0.213            | 0.548                 | 0.798                 |
| <i>Bifidobacterium dentium</i>                            | 0.204             | 0.367            | 0.579                 | 0.807                 |
| <i>Facklamia hominis</i>                                  | -0.165            | 0.299            | 0.582                 | 0.807                 |
| <i>Porphyromonas bennonis</i>                             | -0.135            | 0.235            | 0.567                 | 0.807                 |
| <i>Corynebacterium genitalium</i>                         | 0.115             | 0.229            | 0.615                 | 0.818                 |
| <i>Anaerococcus senegalensis</i>                          | -0.138            | 0.261            | 0.598                 | 0.818                 |
| <i>Corynebacterium tuberculostearicum</i>                 | 0.156             | 0.306            | 0.610                 | 0.818                 |
| <i>Fenollaria</i>                                         | 0.110             | 0.267            | 0.682                 | 0.882                 |
| <i>Arcanobacterium</i>                                    | 0.096             | 0.234            | 0.683                 | 0.882                 |
| <i>Anaerococcus lactolyticus</i>                          | -0.093            | 0.267            | 0.728                 | 0.928                 |

| Taxon                                                      | Moisturizer (Est) | Moisturizer (SE) | Moisturizer (p-value) | Moisturizer (q-value) |
|------------------------------------------------------------|-------------------|------------------|-----------------------|-----------------------|
| <i>Actinomyces neuui</i>                                   | -0.137            | 0.417            | 0.742                 | 0.933                 |
| <i>Finegoldia magna</i>                                    | -0.099            | 0.398            | 0.803                 | 0.941                 |
| <i>Lawsonella</i>                                          | 0.085             | 0.305            | 0.780                 | 0.941                 |
| <i>Streptococcus anginosus</i> group                       | -0.139            | 0.610            | 0.820                 | 0.941                 |
| <i>Lactobacillus iners</i>                                 | -0.178            | 0.732            | 0.808                 | 0.941                 |
| <i>Dialister</i> sp. type 2                                | -0.112            | 0.385            | 0.772                 | 0.941                 |
| <i>Anaerococcus hydrogenalis/rubeifantis</i>               | 0.071             | 0.304            | 0.815                 | 0.941                 |
| <i>Actinobaculum massiliense</i>                           | -0.081            | 0.294            | 0.783                 | 0.941                 |
| <i>Bifidobacterium longum</i>                              | 0.049             | 0.272            | 0.859                 | 0.951                 |
| <i>Prevotella corporis</i>                                 | 0.058             | 0.308            | 0.852                 | 0.951                 |
| <i>Actinotignum schaalii</i>                               | -0.054            | 0.284            | 0.851                 | 0.951                 |
| <i>Corynebacterium pseudogenitalium/tuberculostearicum</i> | -0.048            | 0.324            | 0.882                 | 0.965                 |
| <i>Corynebacterium mycetoides</i>                          | -0.027            | 0.271            | 0.920                 | 0.969                 |
| <i>Gardnerella vaginalis</i>                               | -0.052            | 0.668            | 0.938                 | 0.969                 |
| <i>Parvimonas</i>                                          | -0.034            | 0.258            | 0.897                 | 0.969                 |
| <i>Murdochella asaccharolytica/Levyella massiliensis</i>   | -0.022            | 0.234            | 0.926                 | 0.969                 |
| <i>Campylobacter hominis</i>                               | -0.021            | 0.251            | 0.933                 | 0.969                 |
| <i>Corynebacterium coyleae</i>                             | 0.017             | 0.258            | 0.948                 | 0.969                 |
| <i>Helcococcus</i>                                         | -0.006            | 0.251            | 0.981                 | 0.985                 |
| <i>Ureaplasma parvum/urealyticum</i>                       | 0.006             | 0.338            | 0.985                 | 0.985                 |

**Supplement 2, eTable 3: Comparison of change in individual metabolites in the estradiol group versus the placebo group**

| Metabolite                   | Estradiol (Estimate) | Estradiol (SE) | Estradiol (p-value) | Estradiol (q-value) |
|------------------------------|----------------------|----------------|---------------------|---------------------|
| Methionine                   | 1.185                | 0.211          | <0.001              | <0.001              |
| ethanolamine                 | 0.903                | 0.172          | <0.001              | <0.001              |
| Cytosine                     | 2.065                | 0.404          | <0.001              | <0.001              |
| Guanosine                    | 1.369                | 0.280          | <0.001              | <0.001              |
| N-Carbamoyl-B-Alanine        | 0.933                | 0.200          | <0.001              | <0.001              |
| NADH                         | 0.914                | 0.224          | <0.001              | 0.001               |
| Indole-3-Lactate             | 1.114                | 0.274          | <0.001              | 0.001               |
| 5'-methylthioadenosine       | 0.888                | 0.219          | <0.001              | 0.001               |
| Leucine /D-norleucine        | 0.801                | 0.206          | <0.001              | 0.001               |
| Tryptophan                   | 0.752                | 0.200          | <0.001              | 0.002               |
| Uridine                      | 1.028                | 0.278          | <0.001              | 0.002               |
| iso-Leucine /allo-isoleucine | 0.772                | 0.210          | <0.001              | 0.002               |
| Hypoxanthine                 | 0.829                | 0.226          | <0.001              | 0.002               |
| Hydroxyproline               | 0.311                | 0.088          | 0.001               | 0.003               |
| 2-Aminoadipate               | 0.668                | 0.190          | 0.001               | 0.003               |
| phenyllactic acid            | 1.533                | 0.445          | 0.001               | 0.003               |
| pseudouridine                | 0.512                | 0.149          | 0.001               | 0.003               |
| Mevalonate                   | 1.068                | 0.315          | 0.001               | 0.004               |
| N-Ac-Glutamate               | 0.470                | 0.140          | 0.001               | 0.004               |
| lactate                      | 0.588                | 0.182          | 0.002               | 0.005               |
| Sarcosine                    | 0.215                | 0.067          | 0.002               | 0.005               |
| Adenine                      | 1.615                | 0.503          | 0.002               | 0.005               |
| riboflavin                   | 0.736                | 0.229          | 0.002               | 0.005               |
| Tyramine                     | 1.871                | 0.608          | 0.003               | 0.008               |
| Alanine                      | 0.197                | 0.064          | 0.003               | 0.008               |
| Phenylalanine                | 0.562                | 0.189          | 0.003               | 0.010               |
| Mannose                      | 0.579                | 0.201          | 0.005               | 0.013               |
| Valine                       | 0.752                | 0.264          | 0.005               | 0.014               |
| Pentothenate                 | 0.611                | 0.215          | 0.005               | 0.014               |
| N-Ac-Alanine                 | 0.448                | 0.179          | 0.014               | 0.035               |
| arabitol/xylitol             | 0.418                | 0.169          | 0.014               | 0.036               |
| Asparagine                   | 0.422                | 0.172          | 0.015               | 0.038               |
| Glycine                      | 0.295                | 0.127          | 0.022               | 0.051               |
| succinylcarnitine            | 0.422                | 0.188          | 0.026               | 0.058               |
| Cystine                      | 0.419                | 0.189          | 0.028               | 0.061               |
| N-Acetylneuraminic acid      | 0.466                | 0.211          | 0.029               | 0.063               |
| Threonine                    | 0.273                | 0.127          | 0.033               | 0.068               |
| PPA                          | 0.429                | 0.201          | 0.035               | 0.070               |
| N-Ac-Tyrosine                | 0.306                | 0.145          | 0.037               | 0.074               |
| Uracil                       | 0.744                | 0.370          | 0.046               | 0.091               |
| homoarginine                 | 0.509                | 0.255          | 0.047               | 0.091               |
| 2-Hydroxyisovaleric Acid     | -0.167               | 0.069          | 0.016               | 0.040               |
| L-Kynurenine                 | -0.213               | 0.104          | 0.042               | 0.083               |
| N-Ac-Tryptophan              | -0.324               | 0.112          | 0.004               | 0.012               |
| cis-aconitate                | -0.383               | 0.102          | 0.000               | 0.002               |
| phenylacetic acid            | -0.420               | 0.191          | 0.030               | 0.064               |
| Acetylcarnitine              | -0.420               | 0.172          | 0.016               | 0.038               |
| Acetoacetate                 | -0.442               | 0.204          | 0.032               | 0.066               |
| PGE                          | -0.449               | 0.118          | 0.000               | 0.001               |
| 2-hydroxybutyrate            | -0.452               | 0.228          | 0.049               | 0.094               |
| gentisate                    | -0.452               | 0.135          | 0.001               | 0.004               |
| 2-hydroxyphenylacetate       | -0.469               | 0.208          | 0.025               | 0.057               |
| Glycochenodeoxycholate       | -0.477               | 0.128          | 0.000               | 0.002               |
| Glycerol-3-P                 | -0.478               | 0.211          | 0.025               | 0.057               |
| indole-3-carboxylic acid     | -0.493               | 0.205          | 0.017               | 0.041               |
| o-phosphoethanolamine        | -0.494               | 0.162          | 0.003               | 0.008               |
| threonic/erythronic acid     | -0.497               | 0.119          | 0.000               | 0.001               |
| 3/4-hydroxyphenylacetic acid | -0.504               | 0.223          | 0.025               | 0.057               |
| biliverdin                   | -0.512               | 0.139          | 0.000               | 0.002               |
| N-Acetyl-Aspartate (naa)     | -0.523               | 0.158          | 0.001               | 0.004               |
| Kynurenic Acid               | -0.546               | 0.147          | 0.000               | 0.002               |
| Sucrose                      | -0.550               | 0.275          | 0.047               | 0.091               |
| Indole-3-Acetic Acid         | -0.556               | 0.197          | 0.005               | 0.014               |
| Urate                        | -0.562               | 0.136          | 0.000               | 0.001               |
| Citrulline                   | -0.566               | 0.135          | 0.000               | 0.001               |
| Adipic Acid                  | -0.572               | 0.160          | 0.000               | 0.002               |
| hydrocinnamic acid           | -0.575               | 0.179          | 0.002               | 0.005               |
| Linoleic Acid                | -0.610               | 0.186          | 0.001               | 0.005               |

| Metabolite                      | Estradiol (Estimate) | Estradiol (SE) | Estradiol (p-value) | Estradiol (q-value) |
|---------------------------------|----------------------|----------------|---------------------|---------------------|
| Citraconic Acid                 | -0.618               | 0.185          | 0.001               | 0.004               |
| Alpha-Ketoglutaric Acid         | -0.625               | 0.154          | 0.000               | 0.001               |
| Orotate                         | -0.634               | 0.204          | 0.002               | 0.007               |
| 3-hydroxyisovaleric acid        | -0.635               | 0.174          | 0.000               | 0.002               |
| xylose                          | -0.641               | 0.183          | 0.001               | 0.003               |
| Fumaric Acid                    | -0.641               | 0.177          | 0.000               | 0.002               |
| myo-inositol                    | -0.660               | 0.141          | 0.000               | 0.000               |
| 5-Aminovaleric Acid             | -0.696               | 0.169          | 0.000               | 0.001               |
| 2-oxo-isocaproic acid           | -0.705               | 0.237          | 0.003               | 0.010               |
| Hippuric Acid                   | -0.715               | 0.329          | 0.032               | 0.066               |
| Xanthine                        | -0.734               | 0.284          | 0.011               | 0.028               |
| Inositol                        | -0.846               | 0.219          | 0.000               | 0.001               |
| Arachidonate                    | -0.858               | 0.200          | 0.000               | 0.000               |
| Azelaic Acid                    | -0.878               | 0.198          | 0.000               | 0.000               |
| Glutaric Acid                   | -0.922               | 0.206          | 0.000               | 0.000               |
| 4-hydroxybenzoic acid           | -0.964               | 0.364          | 0.009               | 0.024               |
| Allantoin                       | -1.008               | 0.250          | 0.000               | 0.001               |
| Margaric Acid                   | -1.103               | 0.185          | 0.000               | 0.000               |
| AMP                             | -1.119               | 0.250          | 0.000               | 0.000               |
| Xanthosine                      | -1.309               | 0.317          | 0.000               | 0.001               |
| IMP                             | -1.442               | 0.313          | 0.000               | 0.000               |
| Niacinamide                     | -1.521               | 0.398          | 0.000               | 0.001               |
| isovalerylcarnitine             | -0.374               | 0.190          | 0.051               | 0.095               |
| DCMP                            | 0.433                | 0.221          | 0.051               | 0.095               |
| 3-methyl-3-hydroxyglutaric acid | -0.253               | 0.130          | 0.054               | 0.099               |
| Histamine                       | 0.762                | 0.401          | 0.060               | 0.107               |
| N6-Acetyl-lysine                | -0.342               | 0.180          | 0.060               | 0.107               |
| Glutamic acid                   | 0.214                | 0.114          | 0.062               | 0.110               |
| Reduced glutathione             | 0.606                | 0.327          | 0.066               | 0.117               |
| Proline                         | 0.324                | 0.177          | 0.069               | 0.120               |
| alpha-ketophenylacetic acid     | -0.423               | 0.232          | 0.071               | 0.122               |
| Thymine                         | 0.511                | 0.285          | 0.075               | 0.128               |
| Nicotinic Acid                  | 0.552                | 0.310          | 0.077               | 0.130               |
| Carnitine                       | -0.175               | 0.098          | 0.078               | 0.131               |
| Sorbitol                        | 0.320                | 0.182          | 0.081               | 0.135               |
| mannitol                        | 0.357                | 0.205          | 0.083               | 0.137               |
| NAD                             | 0.377                | 0.221          | 0.090               | 0.147               |
| SAH                             | 0.345                | 0.208          | 0.099               | 0.160               |
| Cadaverine                      | 0.409                | 0.249          | 0.103               | 0.165               |
| deoxycholic acid                | -0.059               | 0.037          | 0.113               | 0.178               |
| N-AcetylGlycine                 | 0.144                | 0.092          | 0.118               | 0.186               |
| CMP                             | -0.263               | 0.171          | 0.127               | 0.196               |
| n-isovalerylglycine             | -0.254               | 0.165          | 0.127               | 0.196               |
| Arginine                        | -0.318               | 0.208          | 0.130               | 0.198               |
| n-formylmethionine              | -0.177               | 0.117          | 0.132               | 0.200               |
| D-Leucic Acid                   | 0.450                | 0.300          | 0.135               | 0.202               |
| 4-Pyridoxic acid                | -0.450               | 0.300          | 0.136               | 0.202               |
| 3-Indoxyl Sulfate               | -0.384               | 0.266          | 0.150               | 0.220               |
| Tyrosine                        | -0.173               | 0.120          | 0.151               | 0.220               |
| dimethylarginine                | -0.202               | 0.142          | 0.158               | 0.229               |
| 3HBA                            | -0.334               | 0.243          | 0.172               | 0.247               |
| 2-oxoisovalerate                | -0.364               | 0.271          | 0.180               | 0.255               |
| Cystathionine                   | -0.096               | 0.071          | 0.181               | 0.255               |
| Malondialdehyde                 | -0.365               | 0.274          | 0.185               | 0.259               |
| Aspartic Acid                   | 0.181                | 0.137          | 0.189               | 0.263               |
| Choline                         | -0.183               | 0.140          | 0.194               | 0.267               |
| Serine                          | -0.134               | 0.103          | 0.195               | 0.267               |
| Adenosine                       | 0.246                | 0.193          | 0.206               | 0.280               |
| 5-methyluridine                 | 0.192                | 0.155          | 0.219               | 0.295               |
| indole-3-propionate             | -0.336               | 0.277          | 0.228               | 0.304               |
| 7-methylguanine                 | 0.235                | 0.197          | 0.235               | 0.312               |
| L-mandelic acid                 | -0.295               | 0.256          | 0.251               | 0.330               |
| trigonelline                    | -0.361               | 0.316          | 0.256               | 0.334               |
| Linolenic Acid                  | 0.122                | 0.109          | 0.264               | 0.341               |
| Putrescine                      | 0.324                | 0.297          | 0.276               | 0.355               |
| gama-Aminobutyrate              | 0.184                | 0.170          | 0.280               | 0.358               |
| UDP-GlcNAc                      | 0.136                | 0.131          | 0.300               | 0.378               |
| beta alanine                    | -0.239               | 0.230          | 0.301               | 0.378               |
| 1-Methyladenosine               | 0.210                | 0.204          | 0.303               | 0.378               |



| Metabolite                  | Estradiol (Estimate) | Estradiol (SE) | Estradiol (p-value) | Estradiol (q-value) |
|-----------------------------|----------------------|----------------|---------------------|---------------------|
| Oxidized glutathione        | -0.219               | 0.220          | 0.321               | 0.398               |
| Creatine                    | 0.080                | 0.086          | 0.349               | 0.430               |
| N-Ac-L-Glutamine            | 0.134                | 0.143          | 0.352               | 0.430               |
| Pyruvate                    | 0.277                | 0.301          | 0.359               | 0.436               |
| 6-Methyladenosine           | -0.089               | 0.103          | 0.390               | 0.470               |
| Oxalacetate                 | 0.118                | 0.139          | 0.397               | 0.475               |
| Lysine                      | -0.138               | 0.172          | 0.425               | 0.505               |
| Glyceraldehyde              | -0.110               | 0.142          | 0.440               | 0.519               |
| Glucuronate                 | 0.175                | 0.230          | 0.448               | 0.525               |
| 2-Hydroxyglutarate          | 0.113                | 0.150          | 0.455               | 0.529               |
| Methyl-OH-isobutyrate       | 0.200                | 0.271          | 0.461               | 0.533               |
| Succinate                   | 0.190                | 0.264          | 0.473               | 0.542               |
| phenylacetylglutamine       | -0.194               | 0.304          | 0.524               | 0.597               |
| Glucose                     | -0.147               | 0.239          | 0.539               | 0.610               |
| Indole                      | 0.019                | 0.035          | 0.584               | 0.657               |
| Inosine                     | 0.189                | 0.356          | 0.597               | 0.668               |
| glutarylcarbitine           | -0.083               | 0.173          | 0.632               | 0.702               |
| N6-Trimethyllysine          | -0.067               | 0.144          | 0.641               | 0.707               |
| Taurine                     | 0.050                | 0.133          | 0.711               | 0.779               |
| Cotinine                    | 0.075                | 0.208          | 0.718               | 0.782               |
| Histidine                   | -0.041               | 0.121          | 0.731               | 0.792               |
| 3-Hydroxykynurenine         | -0.138               | 0.426          | 0.747               | 0.803               |
| Cytidine                    | -0.029               | 0.096          | 0.768               | 0.817               |
| S-methylcysteine            | -0.039               | 0.133          | 0.769               | 0.817               |
| Glutamine                   | 0.027                | 0.109          | 0.803               | 0.847               |
| Ornithine                   | 0.048                | 0.216          | 0.824               | 0.864               |
| methionine sulfoxide        | -0.061               | 0.287          | 0.832               | 0.868               |
| Trimethylamine-N-oxide      | -0.052               | 0.281          | 0.854               | 0.885               |
| Deoxycarnitine              | 0.037                | 0.212          | 0.862               | 0.888               |
| 1/3-Methylhistidine         | 0.031                | 0.211          | 0.882               | 0.903               |
| Glycerate                   | 0.015                | 0.131          | 0.910               | 0.926               |
| N2,N2-Dimethylguanosine     | 0.015                | 0.229          | 0.948               | 0.959               |
| Creatinine                  | -0.007               | 0.184          | 0.971               | 0.976               |
| Cysteinyl-Glycine (Cys-Gly) | 0.001                | 0.103          | 0.989               | 0.989               |

**Supplement 2, eTable 4: Comparison of change in individual metabolites in the moisturizer group versus the placebo group**

| Metabolite                      | Moisturizer (Estimate) | Moisturizer (SE) | Moisturizer (p-value) | Moisturizer (q-value) |
|---------------------------------|------------------------|------------------|-----------------------|-----------------------|
| 5-Aminovaleric Acid             | -0.464                 | 0.166            | 0.006                 | 0.979                 |
| N6-Acetyl-lysine                | -0.397                 | 0.177            | 0.027                 | 0.979                 |
| 2-Amino adipate                 | 0.380                  | 0.187            | 0.044                 | 0.979                 |
| PGE                             | -0.233                 | 0.116            | 0.047                 | 0.979                 |
| Arginine                        | -0.410                 | 0.205            | 0.048                 | 0.979                 |
| L-Kynurenine                    | 0.194                  | 0.102            | 0.060                 | 0.979                 |
| 7-methylguanaine                | -0.309                 | 0.194            | 0.112                 | 0.979                 |
| 1/3-Methylhistidine             | -0.329                 | 0.207            | 0.116                 | 0.979                 |
| N-Ac-Alanine                    | -0.278                 | 0.176            | 0.117                 | 0.979                 |
| UDP-GlcNAc                      | 0.194                  | 0.129            | 0.135                 | 0.979                 |
| Creatine                        | 0.126                  | 0.084            | 0.137                 | 0.979                 |
| homoarginine                    | -0.372                 | 0.250            | 0.139                 | 0.979                 |
| NAD                             | -0.315                 | 0.217            | 0.149                 | 0.979                 |
| Guanosine                       | 0.399                  | 0.276            | 0.151                 | 0.979                 |
| Glycerol-3-P                    | 0.299                  | 0.208            | 0.153                 | 0.979                 |
| 3-Hydroxykynurenine             | -0.600                 | 0.418            | 0.154                 | 0.979                 |
| Adenosine                       | 0.271                  | 0.190            | 0.157                 | 0.979                 |
| Citrulline                      | -0.179                 | 0.132            | 0.178                 | 0.979                 |
| Carnitine                       | 0.129                  | 0.097            | 0.183                 | 0.979                 |
| Methyl-OH-isobutyrate           | 0.356                  | 0.266            | 0.183                 | 0.979                 |
| Hippuric Acid                   | 0.427                  | 0.324            | 0.190                 | 0.979                 |
| Hypoxanthine                    | 0.291                  | 0.222            | 0.192                 | 0.979                 |
| Glycerate                       | -0.168                 | 0.129            | 0.194                 | 0.979                 |
| indole-3-propionate             | 0.352                  | 0.273            | 0.199                 | 0.979                 |
| 2-hydroxybutyrate               | -0.286                 | 0.224            | 0.204                 | 0.979                 |
| Uridine                         | 0.345                  | 0.273            | 0.208                 | 0.979                 |
| Succinate                       | 0.327                  | 0.259            | 0.210                 | 0.979                 |
| 3/4-hydroxyphenylacetic acid    | -0.267                 | 0.219            | 0.225                 | 0.979                 |
| Mevalonate                      | 0.375                  | 0.310            | 0.228                 | 0.979                 |
| Margaric Acid                   | -0.219                 | 0.182            | 0.230                 | 0.979                 |
| N6-Trimethyllysine              | -0.169                 | 0.141            | 0.234                 | 0.979                 |
| indole-3-carboxylic acid        | 0.239                  | 0.201            | 0.238                 | 0.979                 |
| N-AcetylGlycine                 | 0.107                  | 0.090            | 0.239                 | 0.979                 |
| Xanthosine                      | -0.367                 | 0.311            | 0.240                 | 0.979                 |
| 6-Methyladenosine               | 0.117                  | 0.102            | 0.250                 | 0.979                 |
| Nicotinic Acid                  | -0.350                 | 0.304            | 0.253                 | 0.979                 |
| Valine                          | -0.296                 | 0.260            | 0.257                 | 0.979                 |
| AMP                             | 0.278                  | 0.246            | 0.260                 | 0.979                 |
| Inositol                        | -0.231                 | 0.215            | 0.286                 | 0.979                 |
| N2,N2-Dimethylguanosine         | -0.239                 | 0.225            | 0.291                 | 0.979                 |
| Inosine                         | 0.353                  | 0.351            | 0.315                 | 0.979                 |
| 2-oxoisovalerate                | 0.267                  | 0.266            | 0.318                 | 0.979                 |
| Glycochenodeoxycholate          | 0.126                  | 0.126            | 0.320                 | 0.979                 |
| phenylacetylglutamine           | 0.297                  | 0.299            | 0.322                 | 0.979                 |
| gentisate                       | 0.129                  | 0.133            | 0.332                 | 0.979                 |
| Tryptophan                      | -0.188                 | 0.197            | 0.340                 | 0.979                 |
| Choline                         | -0.124                 | 0.137            | 0.368                 | 0.979                 |
| 3-Indoxyl Sulfate               | 0.233                  | 0.261            | 0.374                 | 0.979                 |
| 2-Hydroxyisovaleric Acid        | 0.059                  | 0.067            | 0.379                 | 0.979                 |
| Sucrose                         | 0.238                  | 0.271            | 0.380                 | 0.979                 |
| 2-hydroxyphenylacetate          | 0.177                  | 0.204            | 0.387                 | 0.979                 |
| Linolenic Acid                  | 0.093                  | 0.107            | 0.389                 | 0.979                 |
| Arachidonate                    | 0.168                  | 0.197            | 0.393                 | 0.979                 |
| Allantoin                       | -0.209                 | 0.245            | 0.395                 | 0.979                 |
| D-Leucic Acid                   | -0.248                 | 0.295            | 0.402                 | 0.979                 |
| Sorbitol                        | 0.146                  | 0.179            | 0.416                 | 0.979                 |
| gamma-Aminobutyrate             | 0.134                  | 0.167            | 0.423                 | 0.979                 |
| phenyllactic acid               | -0.342                 | 0.438            | 0.436                 | 0.979                 |
| methionine sulfoxide            | -0.216                 | 0.282            | 0.446                 | 0.979                 |
| Aspartic Acid                   | 0.102                  | 0.135            | 0.449                 | 0.979                 |
| Reduced glutathione             | 0.243                  | 0.322            | 0.452                 | 0.979                 |
| Niacinamide                     | 0.295                  | 0.391            | 0.452                 | 0.979                 |
| Pyruvate                        | -0.218                 | 0.296            | 0.463                 | 0.979                 |
| L-mandelic acid                 | -0.180                 | 0.251            | 0.475                 | 0.979                 |
| Cadaverine                      | -0.175                 | 0.245            | 0.475                 | 0.979                 |
| n-formylmethionine              | 0.079                  | 0.115            | 0.491                 | 0.979                 |
| Hydroxyproline                  | 0.060                  | 0.087            | 0.494                 | 0.979                 |
| Alpha-Ketoglutaric Acid         | -0.103                 | 0.152            | 0.498                 | 0.979                 |
| myo-inositol                    | -0.093                 | 0.138            | 0.503                 | 0.979                 |
| 3-methyl-3-hydroxyglutaric acid | 0.085                  | 0.128            | 0.505                 | 0.979                 |
| N-Ac-Tryptophan                 | 0.073                  | 0.110            | 0.507                 | 0.979                 |
| Orotate                         | 0.132                  | 0.200            | 0.510                 | 0.979                 |
| 2-Hydroxyglutarate              | -0.097                 | 0.148            | 0.513                 | 0.979                 |

| Metabolite                    | Moisturizer (Estimate) | Moisturizer (SE) | Moisturizer (p-value) | Moisturizer (q-value) |
|-------------------------------|------------------------|------------------|-----------------------|-----------------------|
| Cystathionine                 | -0.046                 | 0.070            | 0.514                 | 0.979                 |
| Cystine                       | 0.121                  | 0.185            | 0.515                 | 0.979                 |
| alpha-ketophenylacetic acid   | -0.146                 | 0.229            | 0.523                 | 0.979                 |
| deoxycholic acid              | 0.023                  | 0.036            | 0.524                 | 0.979                 |
| Ornithine                     | 0.135                  | 0.212            | 0.527                 | 0.979                 |
| dimethylarginine              | -0.086                 | 0.140            | 0.542                 | 0.979                 |
| Indole-3-Lactate              | -0.164                 | 0.270            | 0.545                 | 0.979                 |
| Azelaic Acid                  | -0.117                 | 0.195            | 0.549                 | 0.979                 |
| trigonelline                  | -0.181                 | 0.311            | 0.561                 | 0.979                 |
| Malondialdehyde               | 0.156                  | 0.269            | 0.564                 | 0.979                 |
| biliverdin                    | 0.078                  | 0.136            | 0.569                 | 0.979                 |
| N-Carbamoyl-B-Alanine         | -0.111                 | 0.197            | 0.573                 | 0.979                 |
| glutaryl carnitine            | -0.094                 | 0.170            | 0.580                 | 0.979                 |
| Indole-3-Acetic Acid          | 0.107                  | 0.193            | 0.580                 | 0.979                 |
| Acetylcarnitine               | 0.093                  | 0.169            | 0.581                 | 0.979                 |
| Proline                       | -0.092                 | 0.174            | 0.597                 | 0.979                 |
| Putrescine                    | 0.150                  | 0.292            | 0.608                 | 0.979                 |
| IMP                           | 0.158                  | 0.308            | 0.610                 | 0.979                 |
| Serine                        | 0.051                  | 0.101            | 0.615                 | 0.979                 |
| Uracil                        | 0.182                  | 0.364            | 0.618                 | 0.979                 |
| Glucose                       | -0.117                 | 0.235            | 0.620                 | 0.979                 |
| 3HBA                          | -0.117                 | 0.239            | 0.626                 | 0.979                 |
| Glycine                       | 0.061                  | 0.125            | 0.627                 | 0.979                 |
| N-Acetyl-Aspartate (naa)      | 0.075                  | 0.155            | 0.628                 | 0.979                 |
| Xanthine                      | -0.135                 | 0.280            | 0.630                 | 0.979                 |
| o-phosphoethanolamine         | 0.076                  | 0.160            | 0.635                 | 0.979                 |
| iso-Leucine /allo-isoleucine  | -0.097                 | 0.207            | 0.640                 | 0.979                 |
| n-isovalerylglycine           | 0.075                  | 0.163            | 0.643                 | 0.979                 |
| pseudouridine                 | -0.068                 | 0.147            | 0.646                 | 0.979                 |
| Thymine                       | -0.128                 | 0.280            | 0.648                 | 0.979                 |
| Phenylalanine                 | -0.085                 | 0.186            | 0.649                 | 0.979                 |
| N-Acetylneuraminate           | -0.094                 | 0.208            | 0.652                 | 0.979                 |
| Fumaric Acid                  | 0.079                  | 0.174            | 0.653                 | 0.979                 |
| Citraconic Acid               | 0.082                  | 0.181            | 0.653                 | 0.979                 |
| ethanolamine                  | -0.072                 | 0.169            | 0.670                 | 0.979                 |
| Glutamine                     | 0.045                  | 0.107            | 0.673                 | 0.979                 |
| Glyceraldehyde                | 0.058                  | 0.140            | 0.677                 | 0.979                 |
| N-Ac-Glutamate                | -0.056                 | 0.137            | 0.682                 | 0.979                 |
| Adipic Acid                   | 0.064                  | 0.157            | 0.686                 | 0.979                 |
| 4-Pyridoxic acid              | 0.119                  | 0.295            | 0.686                 | 0.979                 |
| Histamine                     | -0.153                 | 0.395            | 0.699                 | 0.979                 |
| N-Ac-L-Glutamine              | 0.054                  | 0.141            | 0.703                 | 0.979                 |
| isovalerylcarnitine           | 0.071                  | 0.186            | 0.705                 | 0.979                 |
| Deoxycarnitine                | -0.078                 | 0.209            | 0.709                 | 0.979                 |
| Glucuronate                   | 0.084                  | 0.226            | 0.711                 | 0.979                 |
| SAH                           | -0.075                 | 0.204            | 0.714                 | 0.979                 |
| Oxidized glutathione          | 0.077                  | 0.217            | 0.721                 | 0.979                 |
| Leucine /D-norleucine         | -0.072                 | 0.203            | 0.723                 | 0.979                 |
| xylose                        | -0.064                 | 0.180            | 0.724                 | 0.979                 |
| Tyrosine                      | -0.040                 | 0.118            | 0.733                 | 0.979                 |
| 1-Methyladenosine             | 0.066                  | 0.200            | 0.743                 | 0.979                 |
| 5-methyluridine               | -0.050                 | 0.153            | 0.745                 | 0.979                 |
| 3-hydroxyisovaleric acid      | 0.055                  | 0.171            | 0.748                 | 0.979                 |
| hydrocinnamic acid            | 0.057                  | 0.176            | 0.748                 | 0.979                 |
| Acetoacetate                  | 0.064                  | 0.201            | 0.752                 | 0.979                 |
| Cytidine                      | -0.028                 | 0.095            | 0.770                 | 0.979                 |
| Cytosine                      | 0.115                  | 0.397            | 0.773                 | 0.979                 |
| Threonine                     | 0.036                  | 0.125            | 0.776                 | 0.979                 |
| Trimethylamine-N-oxide (TMAO) | -0.078                 | 0.276            | 0.779                 | 0.979                 |
| 5'-methylthioadenosine        | 0.059                  | 0.215            | 0.784                 | 0.979                 |
| Lysine                        | -0.045                 | 0.169            | 0.792                 | 0.979                 |
| mannitol                      | 0.053                  | 0.201            | 0.793                 | 0.979                 |
| DCMP                          | -0.056                 | 0.217            | 0.797                 | 0.979                 |
| CMP                           | -0.042                 | 0.169            | 0.802                 | 0.979                 |
| N-Ac-Tyrosine                 | 0.034                  | 0.143            | 0.812                 | 0.979                 |
| beta alanine                  | -0.053                 | 0.226            | 0.816                 | 0.979                 |
| Linoleic Acid                 | -0.042                 | 0.183            | 0.819                 | 0.979                 |
| Creatinine                    | -0.036                 | 0.181            | 0.842                 | 0.979                 |
| Pentothenate                  | 0.036                  | 0.212            | 0.864                 | 0.979                 |
| PPA                           | -0.034                 | 0.198            | 0.864                 | 0.979                 |
| Asparagine                    | 0.029                  | 0.169            | 0.864                 | 0.979                 |
| Mannose                       | 0.034                  | 0.198            | 0.865                 | 0.979                 |
| S-methylcysteine              | -0.022                 | 0.131            | 0.867                 | 0.979                 |
| arabitol/xylitol              | -0.028                 | 0.166            | 0.867                 | 0.979                 |

| Metabolite                  | Moisturizer (Estimate) | Moisturizer (SE) | Moisturizer (p-value) | Moisturizer (q-value) |
|-----------------------------|------------------------|------------------|-----------------------|-----------------------|
| Methionine                  | -0.035                 | 0.208            | 0.868                 | 0.979                 |
| CysteinyI-Glycine (Cys-Gly) | 0.017                  | 0.101            | 0.869                 | 0.979                 |
| cis-aconitate               | -0.016                 | 0.100            | 0.870                 | 0.979                 |
| 4-hydroxybenzoic acid       | 0.057                  | 0.358            | 0.874                 | 0.979                 |
| Cotinine                    | -0.032                 | 0.204            | 0.876                 | 0.979                 |
| NADH                        | -0.032                 | 0.220            | 0.883                 | 0.979                 |
| Alanine                     | 0.009                  | 0.063            | 0.885                 | 0.979                 |
| phenylacetic acid           | 0.027                  | 0.188            | 0.888                 | 0.979                 |
| Kynurenic Acid              | 0.018                  | 0.145            | 0.901                 | 0.985                 |
| Adenine                     | 0.054                  | 0.494            | 0.913                 | 0.985                 |
| Indole                      | 0.003                  | 0.034            | 0.922                 | 0.985                 |
| Oxalacetate                 | -0.011                 | 0.137            | 0.934                 | 0.985                 |
| Glutaric Acid               | 0.014                  | 0.202            | 0.945                 | 0.985                 |
| threonic/erythronic acid    | -0.008                 | 0.117            | 0.946                 | 0.985                 |
| Histidine                   | 0.008                  | 0.119            | 0.949                 | 0.985                 |
| Urate                       | -0.008                 | 0.134            | 0.952                 | 0.985                 |
| riboflavin                  | -0.013                 | 0.225            | 0.954                 | 0.985                 |
| Sarcosine                   | 0.003                  | 0.066            | 0.960                 | 0.985                 |
| 2-oxo-isocaproic acid       | -0.011                 | 0.233            | 0.961                 | 0.985                 |
| Glutamic acid               | 0.004                  | 0.112            | 0.970                 | 0.985                 |
| Tyramine                    | -0.022                 | 0.598            | 0.970                 | 0.985                 |
| Taurine                     | 0.004                  | 0.131            | 0.976                 | 0.985                 |
| lactate                     | -0.005                 | 0.179            | 0.979                 | 0.985                 |
| succinylcarnitine           | 0.001                  | 0.185            | 0.995                 | 0.995                 |

**Supplement 2 eTable 5: Demographic and clinical characteristics of participants by microbial diversity grouping at baseline**

|                                                | Low diversity (n = 59) | High Diversity (n = 68) | P-value           |
|------------------------------------------------|------------------------|-------------------------|-------------------|
| Age                                            | 60 ± 4                 | 61 ± 4                  | 0.23              |
| Arm                                            |                        |                         |                   |
| Estradiol                                      | 17 (29)                | 21 (30)                 | 0.96              |
| Moisturizer                                    | 22 (37)                | 24 (35)                 |                   |
| Placebo                                        | 20 (34)                | 24 (35)                 |                   |
| Race                                           |                        |                         |                   |
| White                                          | 49 (83)                | 64 (93)                 | 0.03              |
| Black                                          | 6 (10)                 | 0 (0)                   |                   |
| Other                                          | 4 (7)                  | 5 (7)                   |                   |
| MBS                                            |                        |                         |                   |
| Dryness                                        | 12 (20)                | 18 (26)                 | 0.38              |
| Pain with sex                                  | 32 (54)                | 39 (57)                 |                   |
| Itch/Burn/Irritation                           | 15 (26)                | 11 (17)                 |                   |
| VMI < 5% superficial                           | 49/57 (86)             | 54/55 (98)              | <b>0.02</b>       |
| <sup>a</sup> pH                                | 6.2 ± 1.1              | 7.2 ± 0.6               | <b>&lt; 0.001</b> |
| <sup>ab</sup> Serum estradiol (pg/mL)          | 3.41 ± 1.76            | 3.78 ± 1.95             | 0.227             |
| <sup>a</sup> SDI                               | 0.66 ± 0.56            | 2.27 ± 0.96             | <b>&lt; 0.001</b> |
| <i>Lactobacillus/Bifidobacterium</i> dominance | 35 (59)                | 3 (4)                   | <b>&lt; 0.001</b> |
| Subsequent symptom improvement > 2 points      | 29 (49)                | 35 (51)                 | 0.79              |

<sup>a</sup>Mean ± standard deviation

<sup>b</sup>Includes only women in the placebo and estradiol groups for whom we measured serum estradiol
